# Supplementary material for: Chimeric HCMV/HSV-1 and Δγ134.5 oncolytic herpes simplex virus elicit immune mediated antigliomal effect and antitumor memory
Source: PubMed Central journal article supplement — Transl Oncol. 2017 Dec 18;11(1):86–93. doi: 10.1016/j.tranon.2017.10.005 (PMC6002352; doi:10.1016/j.tranon.2017.10.005), 2017-12-18

## Supplemental Figure 1

| <b>Virus</b> | <b>Genetics</b>                      |
|--------------|--------------------------------------|
| R3616        | $\Delta\gamma_1$ 34.5                |
| C101         | $\Delta\gamma_1$ 34.5+EGFP           |
| C134         | $\Delta\gamma_1$ 34.5+HCMV IRS1      |
| C154         | $\Delta\gamma_1$ 34.5+HCMV IRS1+EGFP |
| M2001        | WT+EGFP                              |

# Supplemental Figure 2

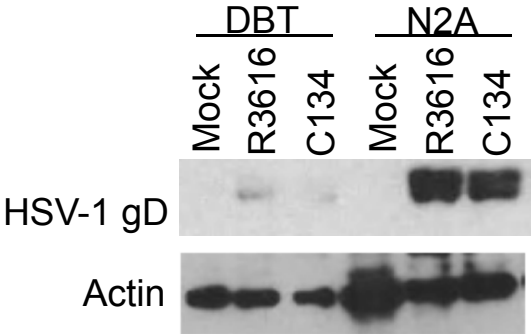

# Supplemental Figure 3

**A**

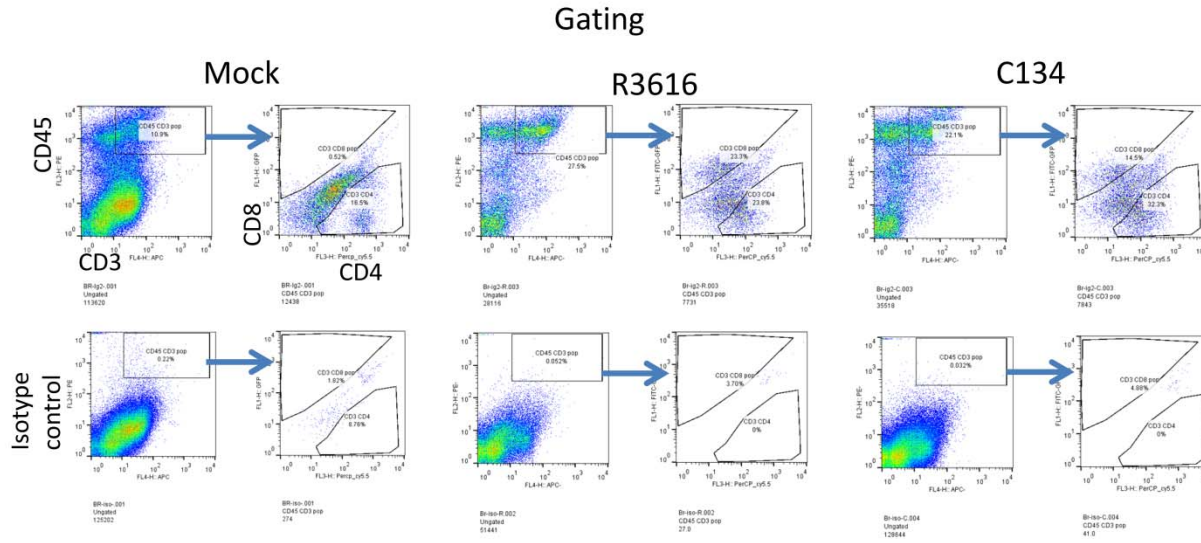

**B**

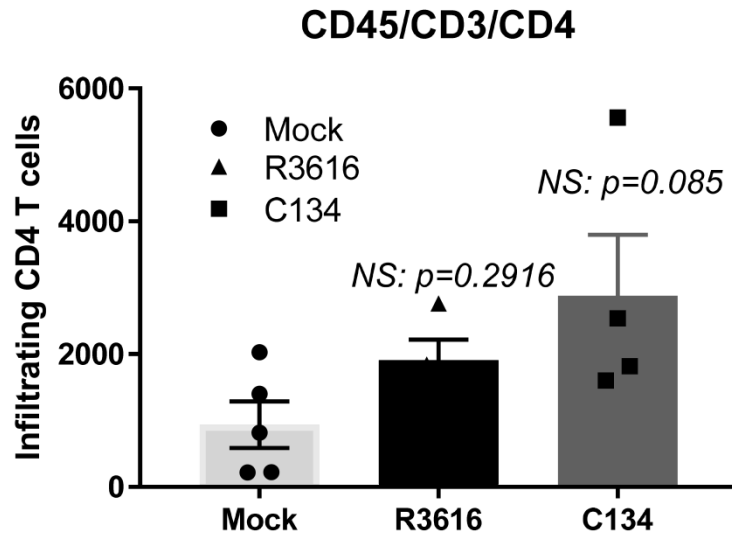

Supplement: mmc1.pdf [file mmc1.pdf]
